# Supplementary material for: Crystal structure of the flexible tandem repeat domain of bacterial cellulose synthesis subunit C
Source: PubMed Central journal article supplement (PMC5638805; doi:10.1038/s41598-017-12530-0), 2017-10-12
Supplement: 41598_2017_12530_MOESM1_ESM.pdf [file 41598_2017_12530_MOESM1_ESM.pdf]

---

Supporting information for

## **Crystal structure of the flexible tandem repeat domain of bacterial cellulose synthesis subunit C**

Shingo Nojima,<sup>1</sup> Ayumi Fujishima,<sup>1</sup> Koji Kato,<sup>1,2</sup> Kayoko Ohuchi,<sup>1</sup> Nobutaka Shimizu,<sup>3</sup> Kento Yonezawa,<sup>3</sup> Kenji Tajima<sup>4</sup> , and Min Yao<sup>1,2,\*</sup>

<sup>1</sup>Laboratory of X-ray structural biology, Graduate school of Life Science, Hokkaido University, Sapporo, Hokkaido, 060-0810, Japan

<sup>2</sup>Faculty of Advanced Life Science, Hokkaido University, Sapporo, Hokkaido, 060-0810, Japan

<sup>3</sup>Photon Factory, Institute of Materials Structure Science, High Energy Accelerator Research Organization (KEK), Tsukuba, Ibaraki, 305-0801, Japan

<sup>4</sup>Laboratory of Polymer Chemistry, Hokkaido University, Sapporo, Hokkaido, 060-8628, Japan

\*Correspondence should to be addressed to M. Yao, email: [yao@castor.sci.hokudai.ac.jp](mailto:yao@castor.sci.hokudai.ac.jp)

---

## 1 Motif = 34 Residues

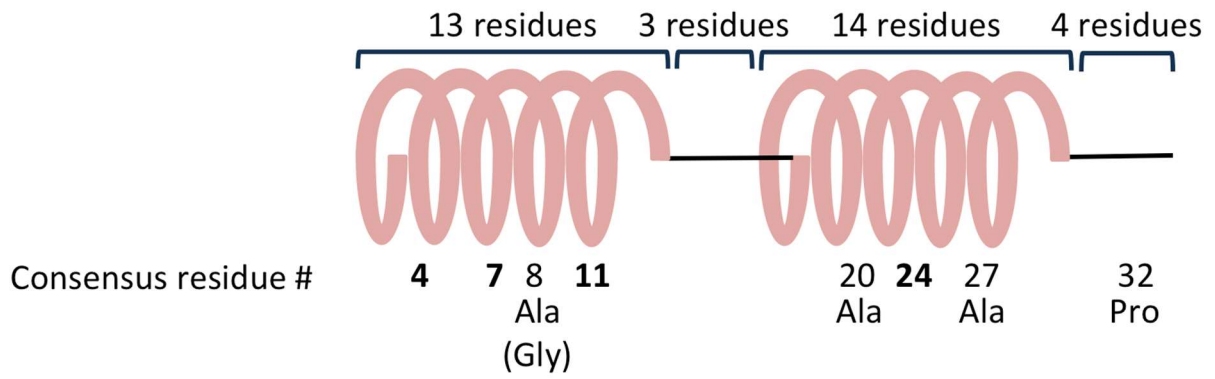

**Figure S1** Secondary structure and consensus residues of the TPR motif. The TPR motif consists of two  $\alpha$ -helices (13 and 14 residues) and two turns (3 and 4 residues). Conserved large hydrophobic amino acids were positioned at residue numbers shown in bold.

```

Enterobacter_sp.      . . . . .DEPTAQQQLLSQVRLGEATKREDLVRQSTYRFLHDPDND
Escherichia_coli     . . . . .AFTAQQQLLEQVRLGEATHREDLVRQSTYRFLHDPDND
Komagataeibactercter_xylinum VFVARAQASTAMTTAATSATAAPRQILLQQRFWLQQQYDNRQALQNERIAPNSD

Enterobacter_sp.      VTAARFRYLLRQGDNAGAQKCLDRMKQLAPDSAYKSSVTSMTLSGAEGRQALQOARLQA
Escherichia_coli     VVAARFRSLLRQGDIDGAQKCLDRILSOLAPSSNAYKSSRTMTLLSTPDGRQALQOARLQA
Komagataeibactercter_xylinum VLEVVLGEYQTAIGNREAADTLRHLQVAPSAAGNLN.DLLSERAISQSDLSQIRSLA

Enterobacter_sp.      TGCHVPEAFAAYDALEFKGNPEEGDTAVEYVWALVAKVPAARSEAITQKALNARNQNAAL
Escherichia_coli     TGHAEEAVASYNKLENGAPEEGDTAVEYVWSTVAKIPARRGEATNQKRIINADAPGNTGL
Komagataeibactercter_xylinum SGQNAQAVAGYQKLEFGGKPEHSLAVEYVQTMAGVPAQWDOARAGLAGVYASNDQDYRA

Enterobacter_sp.      QNSLAQLLFGEGRDAAYAVLEQMAKS.S.AGREAAAGLWYQOTQRMVPSDASVKAL
Escherichia_coli     QNNLAILLFFSSDRRDEGFVLEQMAKS.N.AGREGAASKIMYGQKDMVPSDASVVAL
Komagataeibactercter_xylinum QLAFQAALTYNTSTRMEGLTRLEKDLQSFPSAPVEAAAARQSLRQTLISWLEPVNPEIQSLM

Enterobacter_sp.      QRFLTVFSSGDTVDSARTQLAAQQQLADPAFRARATGLAAVDAQGAKAVNELRQAVNA
Escherichia_coli     KKYLSIFSDGDSVAAAGQQLAEQQQLADPAFRARAQGLAAVDSGMAGKAPPELQAVRA
Komagataeibactercter_xylinum EQWLSAHPNDTALR.EHMLHPPGPPDKACLARQAGYQQLNAGRLLAAEQSFQSLQI

Enterobacter_sp.      NGTDSFAVGCALGOAYSSQGDHARAQAQFPEKAIAMDPTSGNRSKWDSTLKTNR...YWLIT
Escherichia_coli     NPKDSFAVGCALGOAYSSQGDHANAVANIEKAIAMDPTSGNNDKWNSTLKVNR...YWLIT
Komagataeibactercter_xylinum NSHDADSLGMCGLVSMRQGDTAERRYFPEAMADDPKTA.DWRPRLAGMAVSGEYASV

Enterobacter_sp.      QGDAAALKANNPGEAERLYSCARRIDNTDYSAVLGLGDAAMARKDSHAESFYRQALRMD
Escherichia_coli     QGDAAALKANNPDRAERLFQCARNVNDTDSYAVLGLGDAAMARKDYAAESFYRQALRMD
Komagataeibactercter_xylinum RQLI...AAHQYTEAKQQLATLARQPGQYTGATLVMADLQRSTGQIAAABQEYRGLRSE

Enterobacter_sp.      SGNSNAVRGLANVYRARSQ.EADTFIQSLSASQRRSIDDIERGLKNDRLAQQAALLENQ
Escherichia_coli     SGNTNAVRGLANVYRQSPKAEAFIASLSASQRRSIDDIERLSQNDRLAQQAALLENQ
Komagataeibactercter_xylinum PNQALALMCLARVDMAQGTAEARQLLSRVGQYASQVGETVSG...L...MAASQT

Enterobacter_sp.      GQWAQAAEQQRQLALDPGSVWVYRRLASDLRQAGEPREDAHMORLALALPKG...DPE
Escherichia_coli     GKWAQAALQRRQLALDPGSVWVYRRLASDLRQAGQRSQADITLWRNLAQQRSN...DPE
Komagataeibactercter_xylinum SDSAARKVSLREAMAQAPRDFWVIRINLANALQOQGDVAERGRVMPQLANFVTAQDRQAG

Enterobacter_sp.      QVYAYGLYLSGNNOEMALNQLNALPRAQWNSNIQELAERLQTNRLDNNANRLRDSGHEE
Escherichia_coli     QVYAYGLYLSGHDQDRALAHINSDFRAQWNSNIQELVNLRLQSDQVLETANNRLRDSGKEA
Komagataeibactercter_xylinum ILYTYG...SGNDAMTRQLLAGLSPADYSPAIRSIAEEMEIKQDLASRLSMVSNPV.P

Enterobacter_sp.      QRAFLAQQPASTRIDTTLADWAQGGDSASAOHYFNRVLREPN.NQDAILGLAELYAA
Escherichia_coli     EAEALRQPPSTRIDTTLADWAQQRROYTARAAYQNVLTRPFA.NADAILGLTEVDIA
Komagataeibactercter_xylinum LIREALQSPDPTGARGAVADLFRQRGDMVHARMALRIASTRTIDLSPDQRLSYATEYK

Enterobacter_sp.      DGNKMAARAQLAKLPAFTA...QPQSINTQ...RRL.ALVCAA.LGDTDSARQTF
Escherichia_coli     AGDKAAARSQALRLPATD...NALSLNTQ...RRV.ALCAQ.LGDTAAAQRTE
Komagataeibactercter_xylinum ISNPVAAARLALPLSGDGTGSATGSALLPEQVQLQQLRMGISVAQSDLLNQRGDQAQYD

Enterobacter_sp.      RIMPQAKAPPSMESALVLRDAAAFQAQGGEPQOALETWKDAMVASGVTTIPPADND...
Escherichia_coli     KLIPQAKSOPPSMESAMVLRDGAFFEAQAGDPTQALETYKDAMVASGVTTIRPODND...
Komagataeibactercter_xylinum HLAPALQADPEATSPKLAL...ARLYNGHGKPGKALEIDLA...VLRHNPQDLARQ

Enterobacter_sp.      . . . . .TFTRLTRN...NAKDDWIKRGTRSDAA...DIYRQQDIN
Escherichia_coli     . . . . .TFTRLTRN...DEKDDWIKRGVRSDDA...DIY...
Komagataeibactercter_xylinum AAVQAAVNSDHNSLATRLAMDGVQESPMDARAWLAMAVADQAQDGHGQRTIBDLRRAIDL

Enterobacter_sp.      VTLQHD...Y...
Escherichia_coli     . . . . .
Komagataeibactercter_xylinum LQQVEGTRAASGAGAAQEDALAPPSTNPFPRRGYGHQTELGAPVTGGSYSAEAAASPDS

Enterobacter_sp.      . . . . .
Escherichia_coli     . . . . .
Komagataeibactercter_xylinum QMLSSIAGQIRTLR

```

**Figure S2** Conservation of BcsC-TPR domain. BcsC-TPR domains of *Enterobacter* CJF-002 (*Enterobacter\_sp.*), *Escherichia coli* (*Escherichia\_coli*), and *Komagataeibacter xylinum* (*Komagataeibacter\_xylinum*) were aligned. Red boxes indicate strictly conserved region and red characters indicate similar regions.

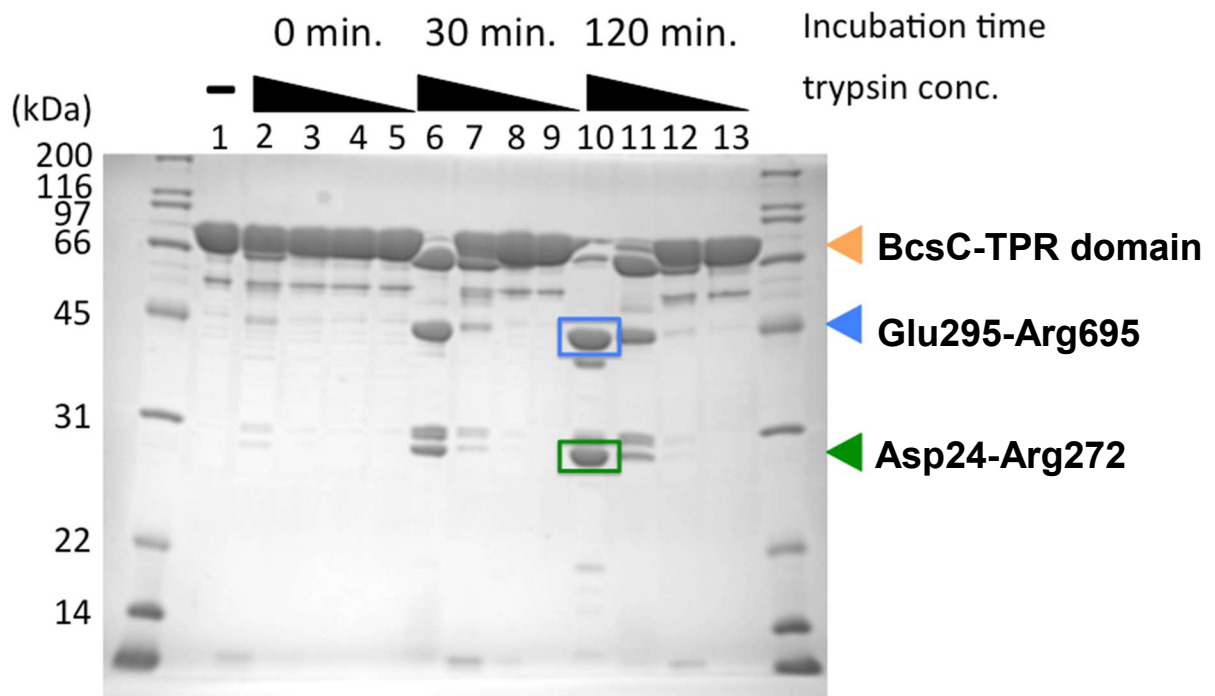

**Figure S3** Limited trypsinolysis of BcsC-TPR domain (Asp24-Arg784). This figure shows 12.5 % SDS-PAGE gel stained by CBB. 100  $\mu$ g BcsC-TPR domain was incubated with no trypsin (Lane 1), with 2  $\mu$ g, 0.2  $\mu$ g, 0.02  $\mu$ g or 0.002  $\mu$ g trypsin for 0 minute (Lane 2-5), with 2  $\mu$ g, 0.2  $\mu$ g, 0.02  $\mu$ g or 0.002  $\mu$ g trypsin for 30 minutes (Lane 6-9), with 2  $\mu$ g, 0.2  $\mu$ g, 0.02  $\mu$ g or 0.002  $\mu$ g trypsin for 120 minutes (Lane 10-13).

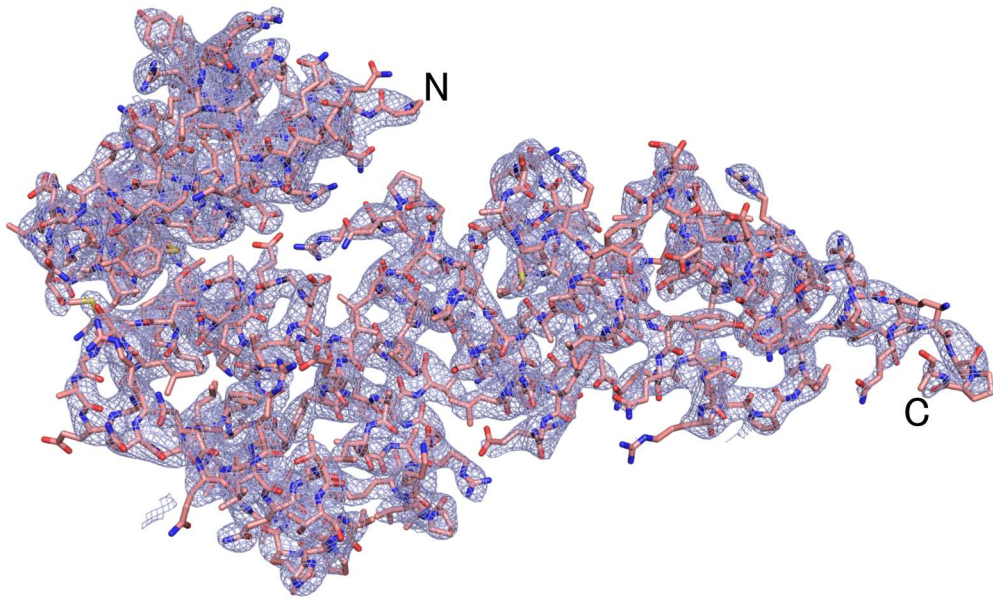

**Figure S4** Electron density map of monomeric BcsC-TPR(N6). Monomeric BcsC-TPR(N6) are shown as wheat sticks. Electron density map contoured at 1.5  $\sigma$  level are shown as blue mesh.

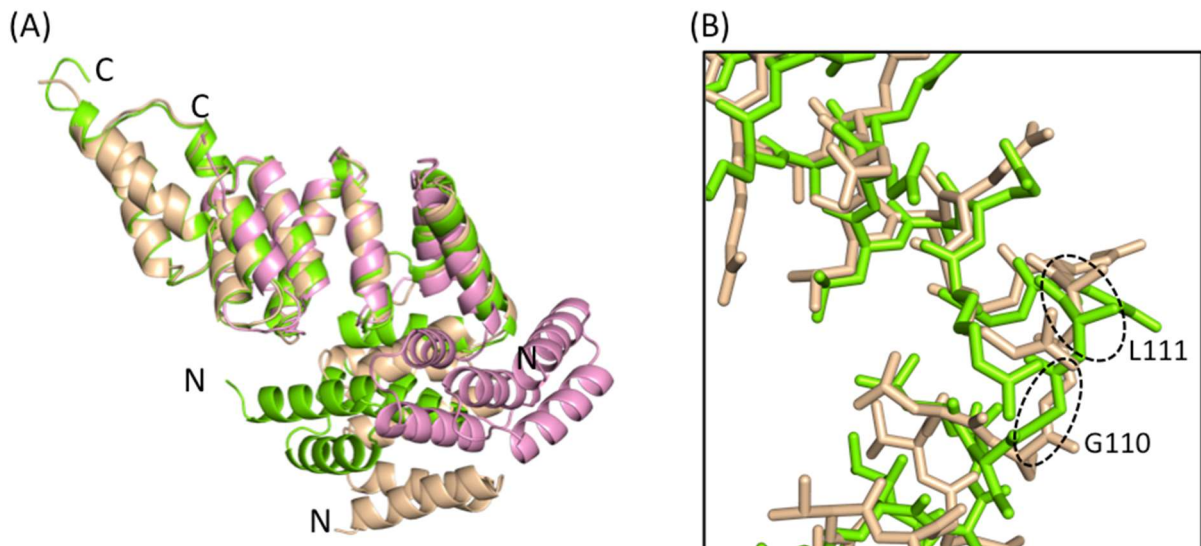

**Figure S5** Structural comparison of BcsC-TPR(N6)s. (A) Superposition of three type chains on  $\alpha 6$ - $\alpha 12$ . (B) Zoomed in and shown in stick format around the turn of inserted region.

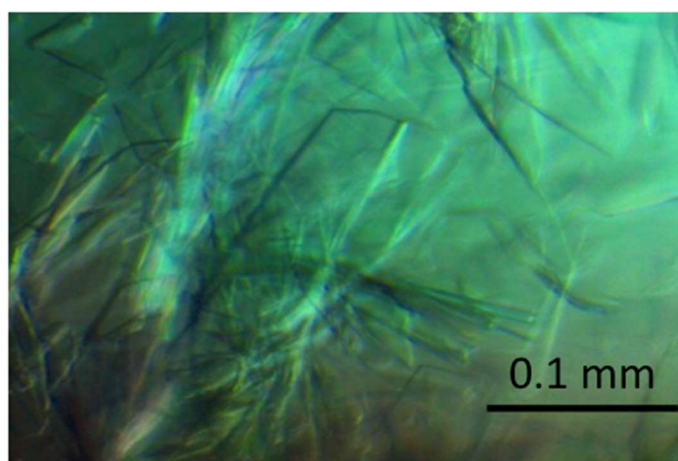

**Figure S6** The crystal photo of BcsC-TPR(N6)

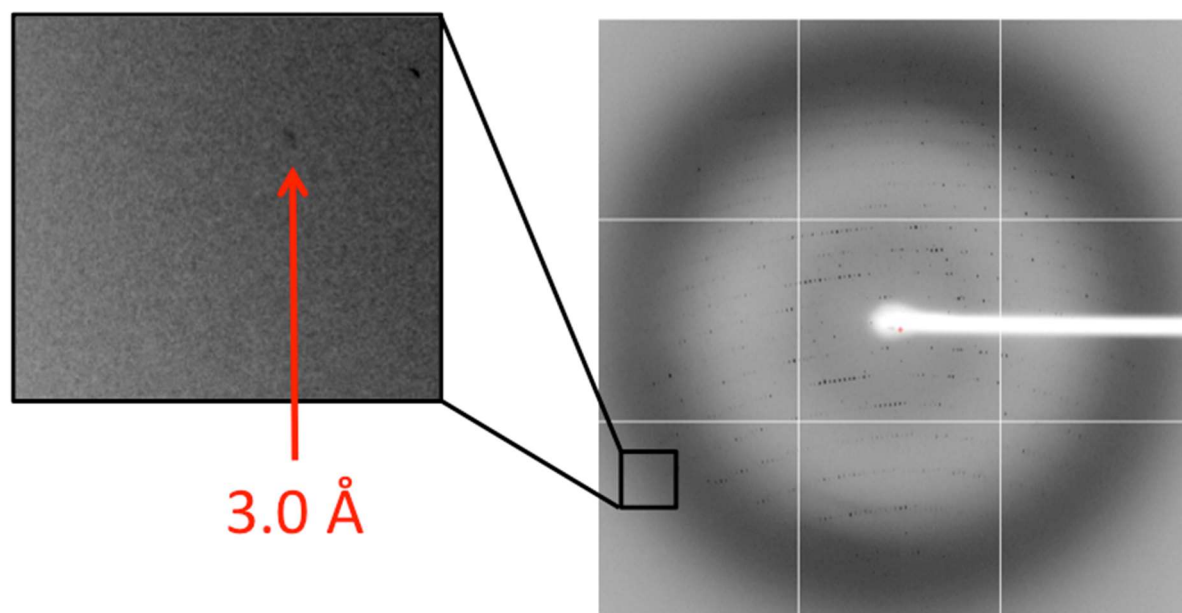

**Figure S7** X-ray diffraction image of a crystal of native BcsC-TPR(N6). Right, X-ray diffraction image of a crystal of BcsC-TPR(N6); left; zoomed-in X-ray diffraction image. The red arrow indicates the observed diffraction spot at maximum resolution (3.0 Å).

**Table S1** Macromolecule production information

|                   | BcsC-TPR domain<br>(Asp24-Arg784) | BcsC-TPR<br>(Asp24-Leu664)             | BcsC-TPR(N6)<br>(Asp24-Arg272)             |
|-------------------|-----------------------------------|----------------------------------------|--------------------------------------------|
| Source organism   | <i>Enterobacter</i> CJF-002       | <i>Enterobacter</i> CJF-002            | <i>Enterobacter</i> CJF-002                |
| DNA source        | UniProt K0IS18                    | UniProt K0IS18                         | UniProt K0IS18                             |
| Forward primer    | ACGGATCCGCATGCG<br>(NdeI)         | ACGGATCCGCATGCG<br>(NdeI)              | ACGGATCCGCATGCG<br>(NdeI)                  |
| Reverse primer    | CGATCCTCTCATAGTTA<br>ATTTC (XhoI) | CCGCTCGAGTTATGCT<br>TTCGCCTGCGG (XhoI) | CCGCTCGAGTTAGCGA<br>AACGCCGGATCG<br>(XhoI) |
| Cloning vector    | Modified pET28a                   | Modified pET28a                        | Modified pET28a                            |
| Expression vector | Modified pET28a                   | Modified pET28a                        | Modified pET28a                            |
| Expression host   | BL21 (DE3)                        | BL21 (DE3)                             | BL21 (DE3)                                 |

**Table S2** Crystallization

|                                        |                                                 |
|----------------------------------------|-------------------------------------------------|
| Method                                 | Sitting vapor-diffusion                         |
| Plate type                             | NeXtal Evolution $\mu$ plate (QIAGEN)           |
| Temperature (K)                        | 293                                             |
| Protein concentration                  | 60 mg / mL                                      |
| Buffer composition of protein solution | 50 mM HEPES (pH 8.0), 150 mM KCl, 10 % glycerol |
| Composition of reservoir solution      | 100 mM MES (pH 6.2), 3.5 M Sodium chloride      |
| Volume and ratio of drop               | 0.5 $\mu$ L + 0.5 $\mu$ L                       |
| Volume of reservoir                    | 50 $\mu$ L                                      |

**Table S3** Data collection and processing statistics

|                                                     | Native BcsC-TPR(N6)     | SeMet BcsC-TPR(N6)    |
|-----------------------------------------------------|-------------------------|-----------------------|
| Diffraction source                                  | BL5A, Photon Factory    | BL44XU, Spring8       |
| Wavelength (Å)                                      | 1.0                     | 0.979                 |
| Temperature (K)                                     | 100                     | 100                   |
| Detector                                            | ADSC Quantum 315r (CCD) | RAYONIX MX300HE (CCD) |
| Crystal-detector distance (mm)                      | 419                     | 350                   |
| Rotation range per image (°)                        | 0.5                     | 1                     |
| Total rotation range (°)                            | 180                     | 360                   |
| Exposure time per image (s)                         | 2                       | 0.3                   |
| Space group                                         | $P2_1$                  | $P2_1$                |
| a, b, c (Å)                                         | 115.8, 55.6, 165.1      | 115.6, 55.8, 164.8    |
| $\alpha, \beta, \gamma$ (°)                         | 90, 95.6, 90            | 90, 95.6, 90          |
| Resolution range (Å)                                | 50 – 3.27 (3.47–3.27)   | 50 – 3.4 (3.6-3.4)    |
| Total No. of reflections                            | 121528                  | 216119                |
| No. of unique reflections                           | 32542                   | 56065                 |
| Completeness (%)                                    | 98.6 (98.2)             | 99.4 (96.8)           |
| Redundancy                                          | 3.7 (3.8)               | 3.85 (3.82)           |
| $\langle I/\sigma(I) \rangle$                       | 10.7 (2.0)              | 8.40 (2.25)           |
| Rmeas † (%)                                         | 13.4 (80.3)             | 24.3 (113.1)          |
| Rmerge ‡ (%)                                        | 11.5 (69.0)             | 20.9 (97.0)           |
| Overall B factor from Wilson plot (Å <sup>2</sup> ) | 62.5                    | 60.6                  |

†  $R_{\text{meas}} = \sum_{hkl} \{N(hkl)/[N(hkl) - 1]\}^{1/2} \sum_i |I_i(hkl) - \langle I_{hkl} \rangle| / \sum_{hkl} \sum_i I_i(hkl)$ , where  $I_i(hkl)$  and  $N(hkl)$  are the mean intensity of a set of equivalent reflections and the multiplicity, respectively.

‡  $R_{\text{merge}} = \sum_{hkl} \sum_i |I_i(hkl) - \langle I(hkl) \rangle| / \sum_{hkl} \sum_i I_i(hkl)$ , where  $I_i(hkl)$  is the  $i$ th observation of reflection  $hkl$  and  $\langle I(hkl) \rangle$  is the average intensity for all  $i$  observations of reflection  $hkl$ .



---

**Table S4** Structure solution and refinement statistics

|                                       |            |
|---------------------------------------|------------|
| Resolution range (Å)                  | 47.7 – 3.3 |
| Completeness (%)                      | 98.7       |
| No. of reflections, working set       | 30914      |
| No. of reflections, test set          | 1627       |
| Final $R_{\text{cryst}}$              | 0.21       |
| Final $R_{\text{free}}$               | 0.26       |
| No. of non-H atoms                    |            |
| Protein                               | 8741       |
| R.m.s. deviations                     |            |
| Bonds (Å)                             | 0.01       |
| Angles (°)                            | 1.40       |
| Average $B$ factors (Å <sup>2</sup> ) |            |
| Protein                               | 82.7       |
| Ramachandran plot                     |            |
| Most favoured (%)                     | 97         |
| Allowed (%)                           | 2.7        |

**Table S5** Details of the result of SAXS experiment and analysis.

|                                         |                                                      |
|-----------------------------------------|------------------------------------------------------|
| <u>Data-collection parameters</u>       |                                                      |
| Beamline                                | PF BL-10C                                            |
| Beam geometry Beam size                 | Bent cylindrical mirror + Two slits<br>V0.35×H0.55mm |
| Wavelength (Å)                          | 1.000                                                |
| Camera distance (mm)                    | 2011                                                 |
| q range (Å <sup>-1</sup> )              | 0.008 – 0.420                                        |
| Exposure time (sec)                     | 20                                                   |
| Temperature (K)                         | 293                                                  |
| <u>Structural parameters</u>            |                                                      |
| I(0) (cm <sup>-1</sup> ) [from P(r)]    | 0.104 ± 0.0003                                       |
| R <sub>g</sub> (Å) [from P(r)]          | 51.3 ± 0.2                                           |
| I(0) (cm <sup>-1</sup> ) [from Guinier] | 0.105 ± 0.0004                                       |
| R <sub>g</sub> (Å) [from Guinier]       | 51.2 ± 0.8                                           |
| D <sub>max</sub> (Å)                    | 185.3                                                |
| Porod volume estimate (Å <sup>3</sup> ) | 115373                                               |
| <u>Molecular-mass determination</u>     |                                                      |
| Estimated MW [from Porod vol.] (kDa)    | 72.1                                                 |
| Calculated MW from sequence (kDa)       | 71.3                                                 |
| Estimated MW [from SEC-MALS] (kDa)      | 71.4                                                 |
